# Supplementary material
Source: PubMed Central journal article supplement (PMC9722545)
Supplement: NIHMS1843419-supplement-2.pdf [file NIHMS1843419-supplement-2.pdf]

# Supplementary Figure 1

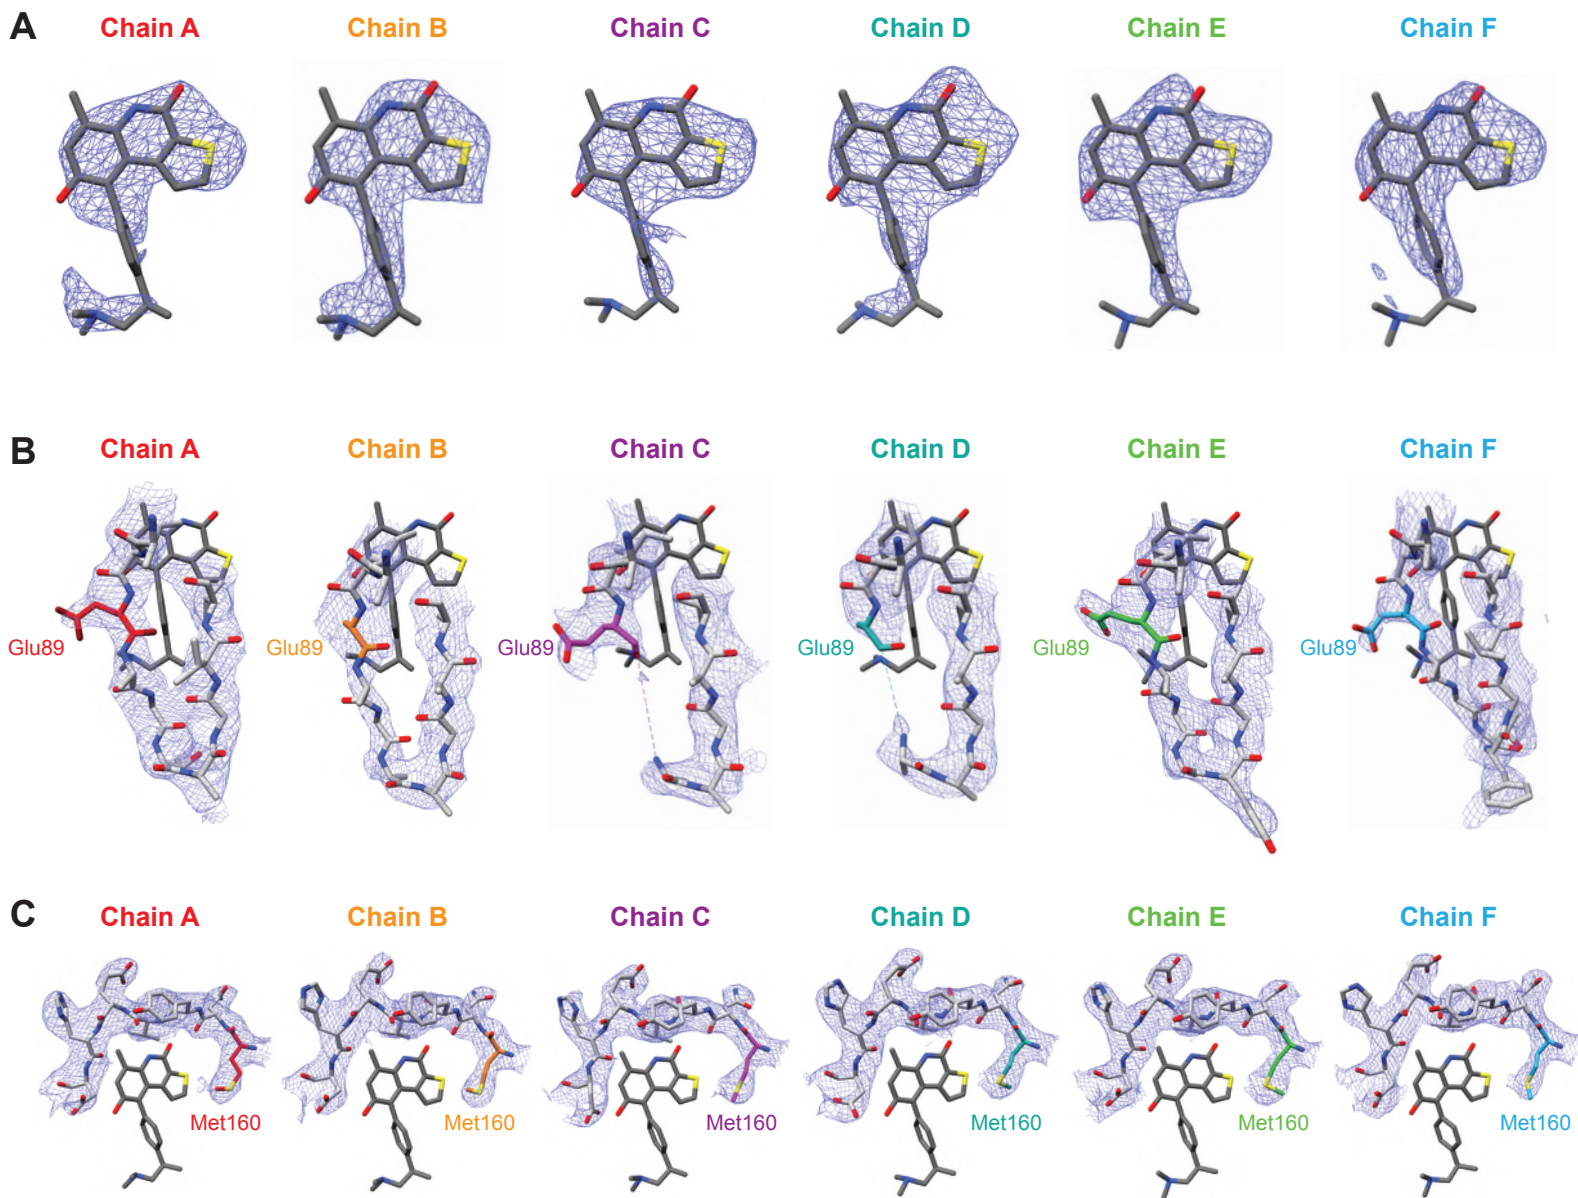

**Supp. Figure 1. Features of the OTS964 binding pocket of CDK11, related to Figure 3.**

(A) View of simulated annealing omit map (mFo-Fc electron density contoured to  $2.5\sigma$ ) for OTS964.

(B) View of the G-rich loop (including Glu89) of each chain of CDK11 in the asymmetric unit showing  $2mFo-DFc$  electron density contoured to  $1\sigma$ .

(C) View of the kinase hinge (including Met160) of each chain of CDK11 in the asymmetric unit showing  $2mFo-DFc$  electron density contoured to  $1\sigma$ .

## Supplementary Figure 2

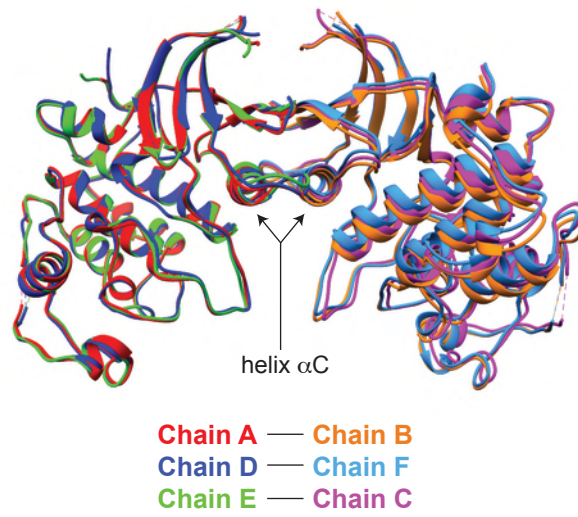

Supp. Figure 2. Crystal packing interactions between CDK11 chains along the surface containing helix  $\alpha C$ , related to Figure 2.

# Supplementary Figure 3

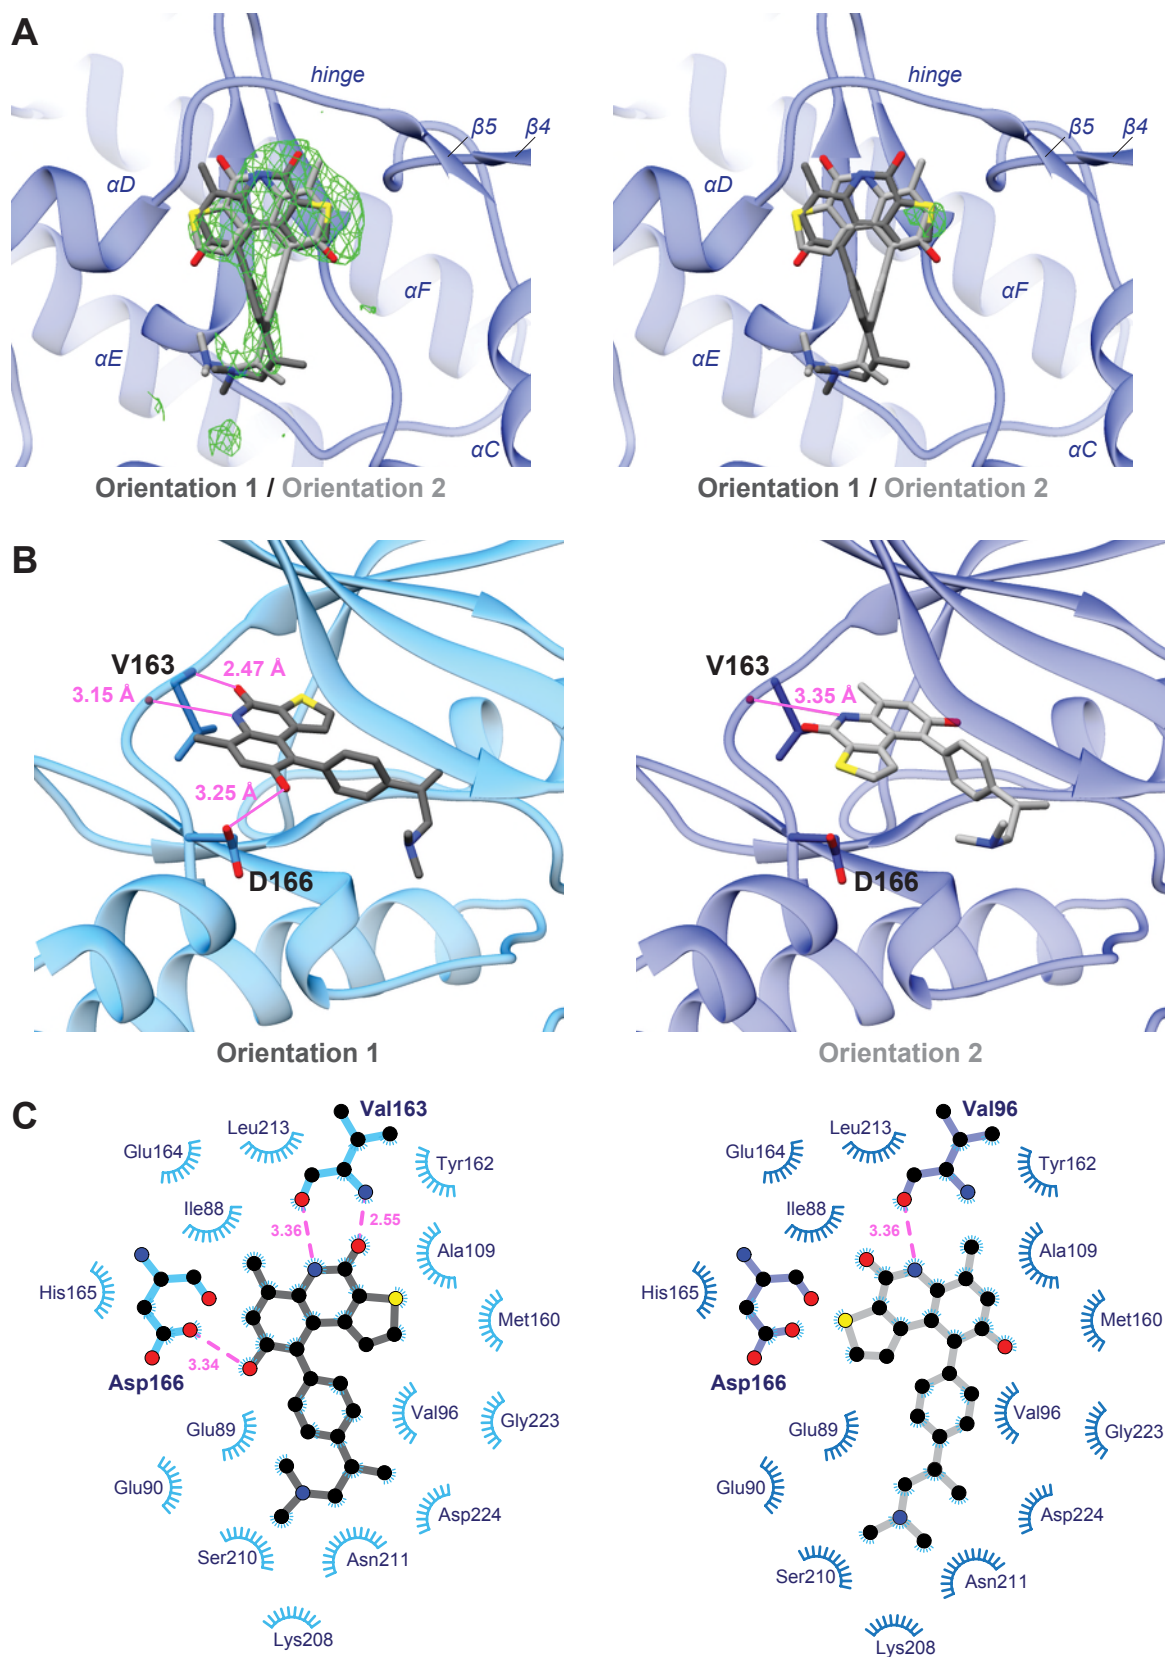

**Supp. Figure 3. Determining the orientation of OTS964 in the active site of CDK11, related to Figure 3.**

**(A)** View of  $|F_o - F_c|$  electron density prior to docking and refinement of OTS964 coordinates in the ATP binding pocket of CDK11 contoured to  $2\sigma$  (left) and  $5.5\sigma$  (right). Strong electron density corresponds to the position of the sulfur atom in Orientation 1.

**(B)** Binding mode of OTS964 in orientation 1 (left) and orientation 2 (right).

**(C)** Ligplot view of CDK11 bound to OTS964 in orientation 1 (left) and orientation 2 (right).

# Supplementary Figure 4

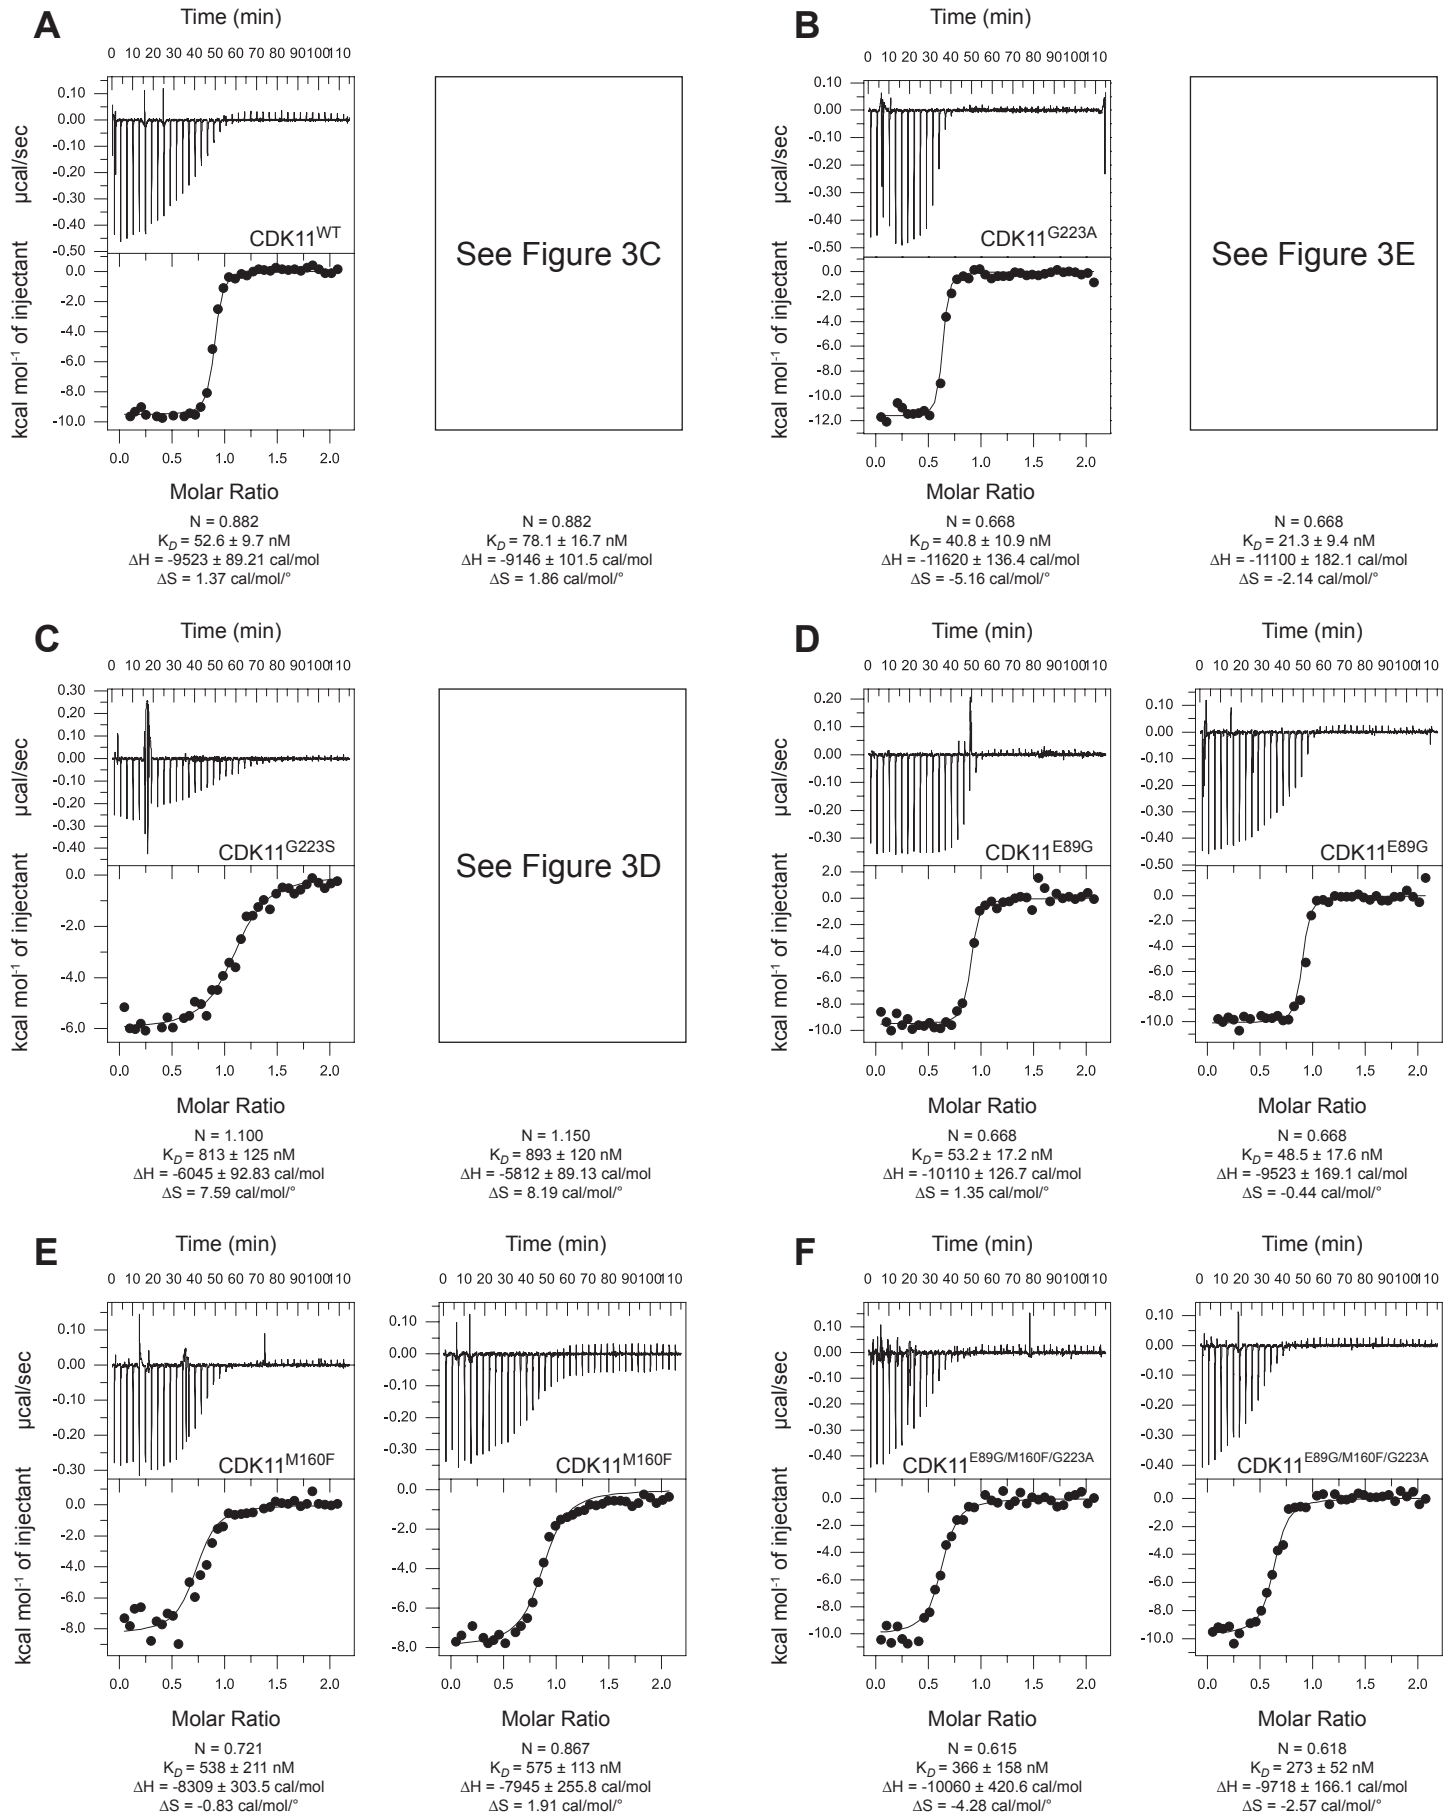

**Supp. Figure 4.** ITC thermograms for individual OTS964-CDK11 binding experiments, related to Table 2.

ITC thermograms and binding constants for OTS964 binding CDK11 wild-type (A) or mutants Gly223Ala (B), Gly223S (C), Glu89Gly (D), Met160Phe (E), or Glu89Gly/Met160Phe/Gly223Ala (F).

# Supplementary Figure 5

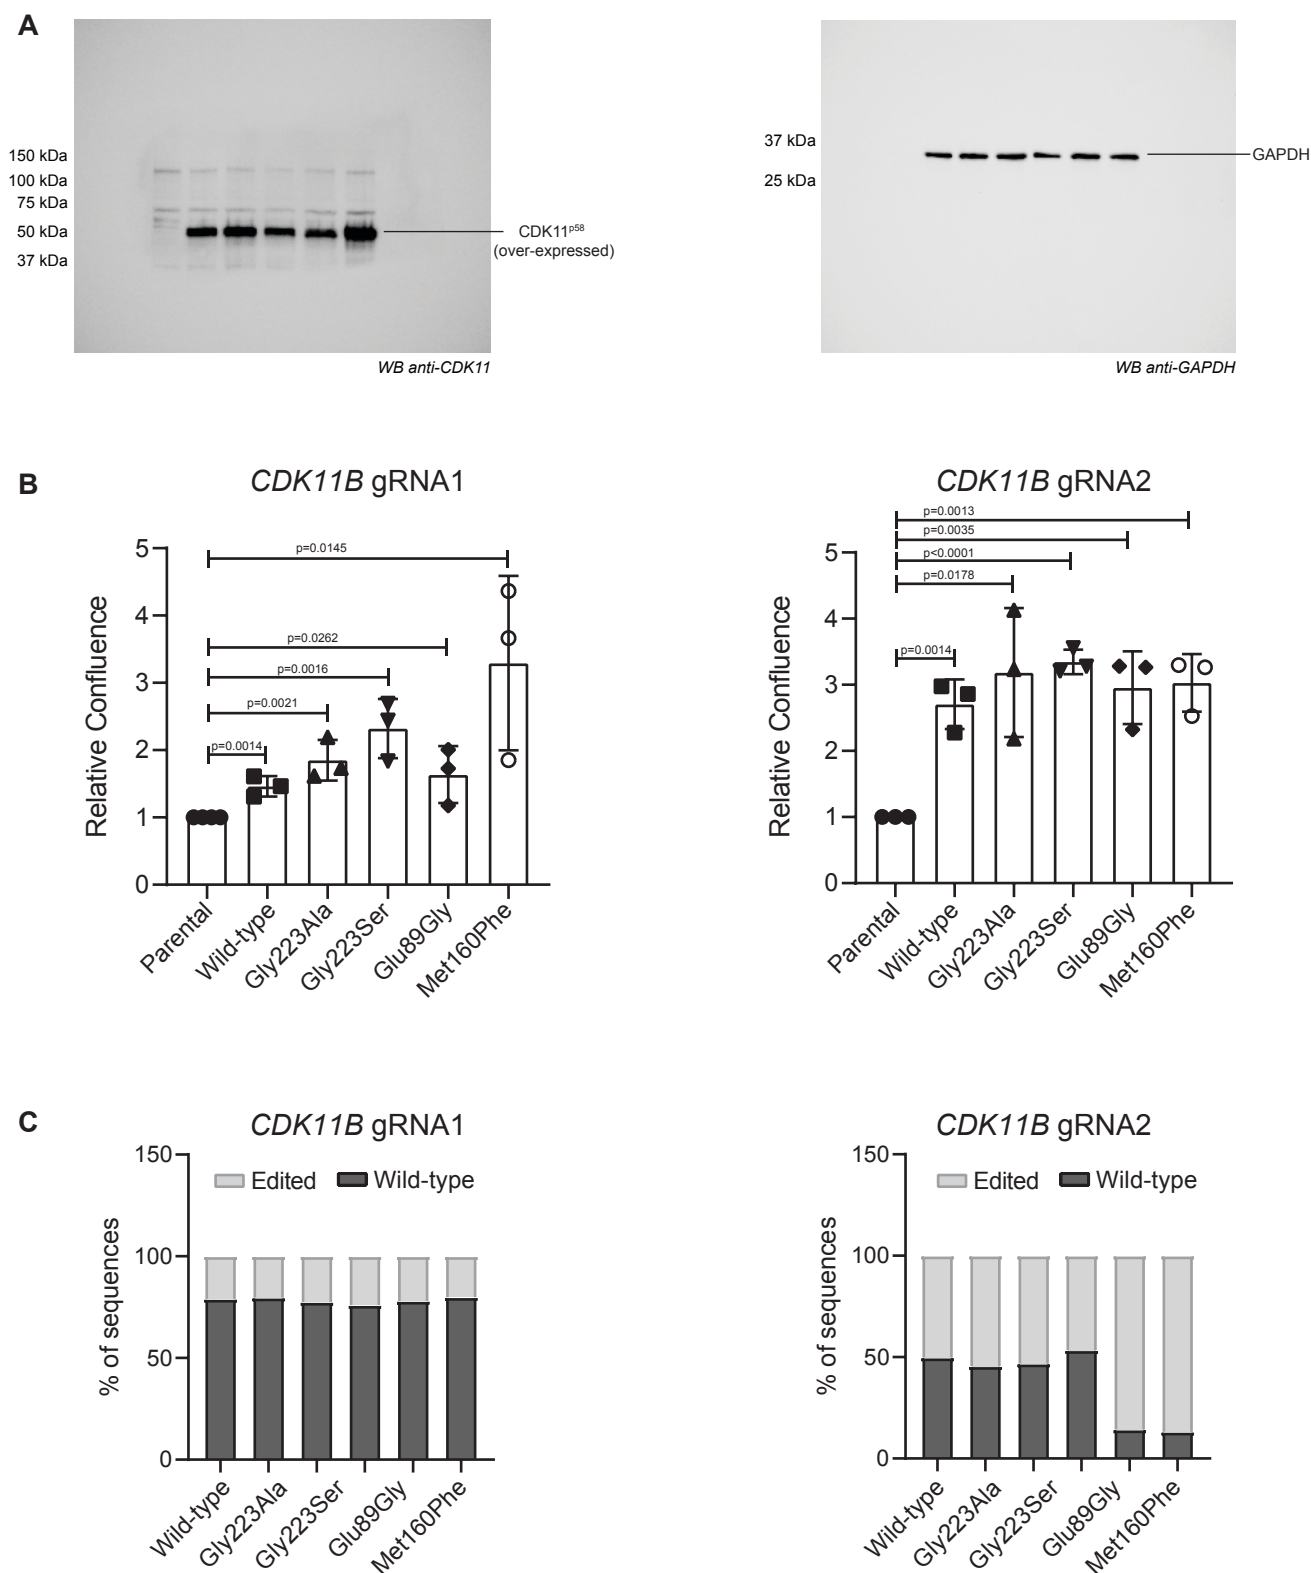

**Supp. Figure 5. Survival of A375 cells expressing CDK11p58 mutants after endogenous *CDK11B* CRISPR knock-out, related to Figure 4.**

**(A)** Complete western blot images from Figure 4A, anti-CDK11 (left) and anti-GAPDH (right)

**(B)** Relative confluence of A375 cell lines stably expressing either CDK11 wild-type or mutants 6 days after treatment to knock-out endogenous *CDK11B*. Data represents three independent replicates, mean  $\pm$  SEM.

**(C)** TIDE analysis performed to quantify the editing efficiency of each gRNA targeting *CDK11B*.

# Supplementary Figure 6

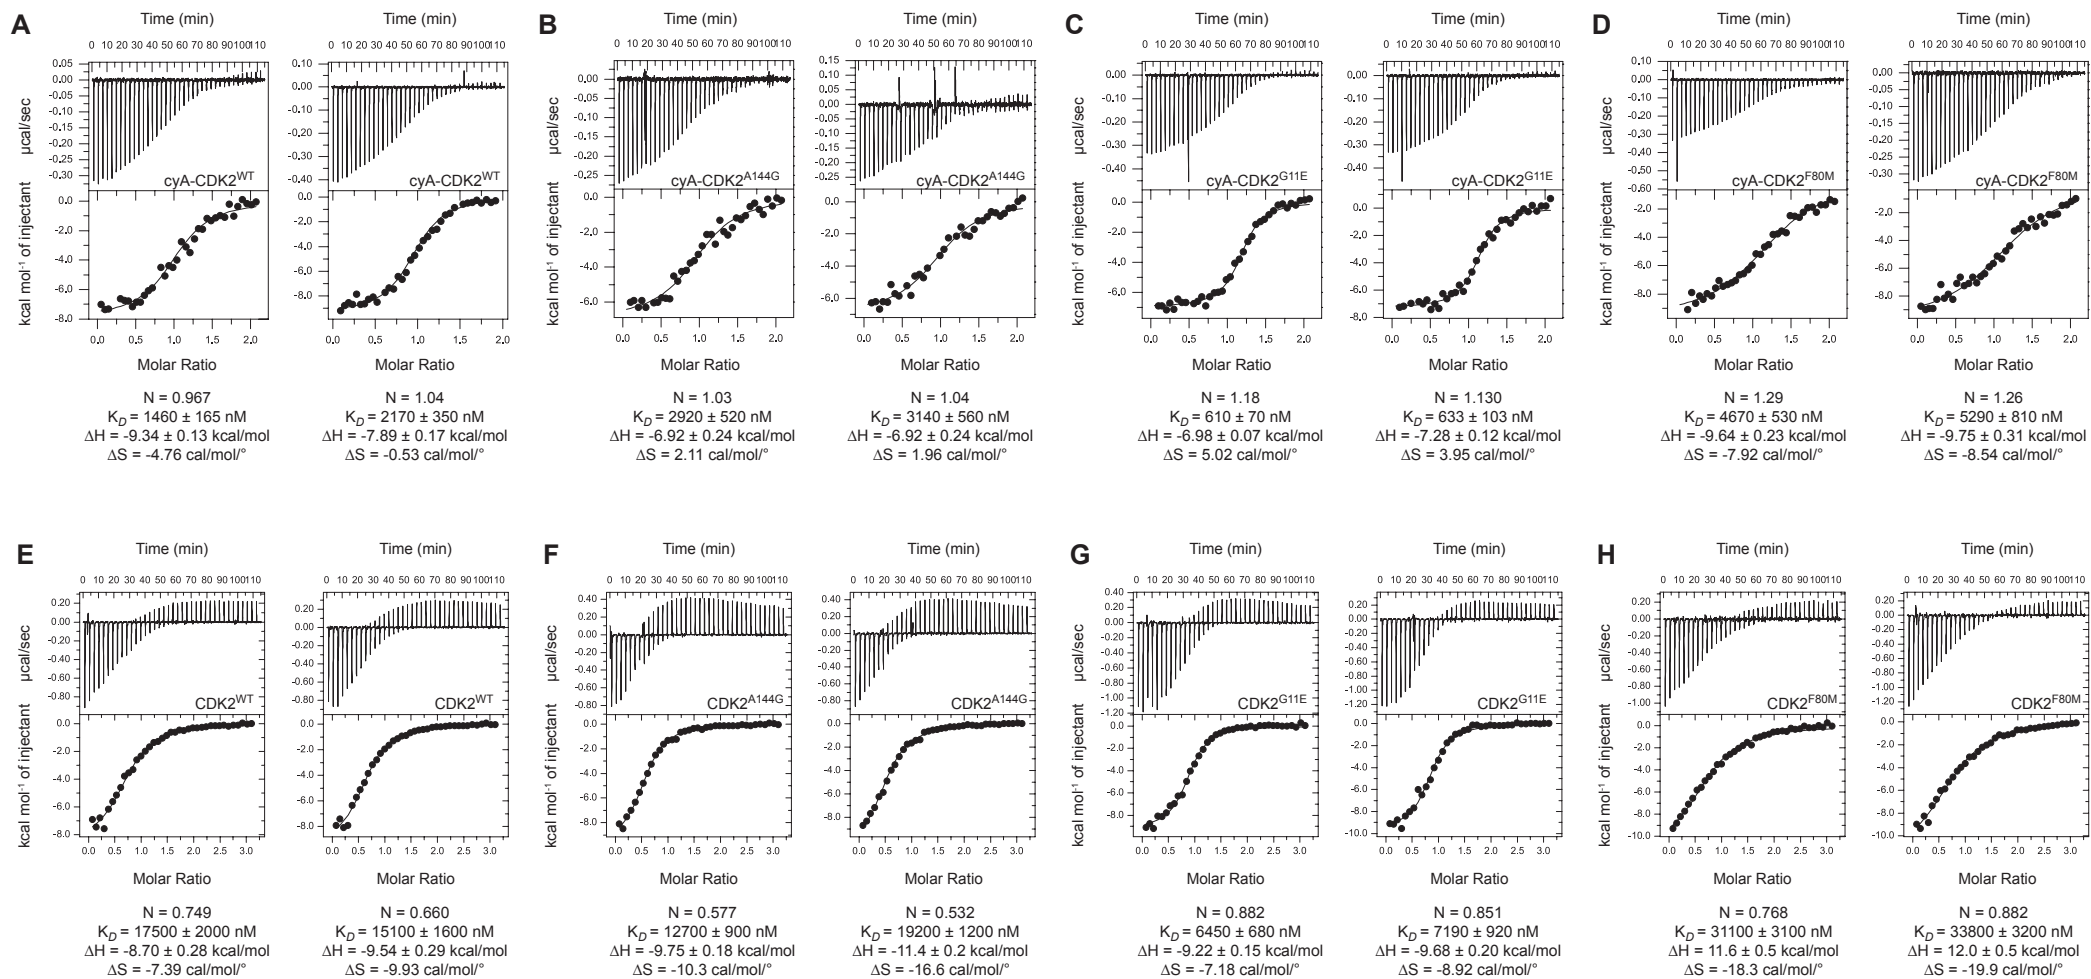

**Supp. Figure 6. ITC thermograms for individual OTS964-CDK2 binding experiments, related to Table 2.**

ITC thermograms and binding constants for OTS964 and CDK2-cyclin A complexes containing either CDK2 wild-type (**A**) or mutants Ala144Gly (**B**), Gly11Glu (**C**), or Phe80Met (**D**).

ITC thermograms and binding constants for OTS964 and CDK2 (no cyclin) wild-type (**E**) or mutants Ala144Gly (**F**), Gly11Glu (**G**), or Phe80Met (**H**).

**Table S1. Additional oligonucleotides, related to STAR Methods**

| REAGENT or RESOURCE                                                             | SOURCE          | IDENTIFIER |
|---------------------------------------------------------------------------------|-----------------|------------|
| Oligonucleotides                                                                |                 |            |
| Primer CDK11B N1 NcoI forward:<br>TCAGCCATGGGGATGAGTGAAGATGAAGAACGAGAA<br>AATGA | ThermoFisher    | N/A        |
| Primer CDK11B N72 NcoI forward:<br>GTCAGCCATGGGGGCCCTGCAGGGCTGC                 | ThermoFisher    | N/A        |
| Primer CDK11B C439 HindIII reverse:<br>TCAGAAGCTTTCAGAACTTGAGGCTGAAGCCG         | ThermoFisher    | N/A        |
| Primer CDK11B C380 HindIII reverse:<br>TCAGAAGCTTGGGGAACATGGAGGGGTGC            | ThermoFisher    | N/A        |
| Primer CDK11 M516F forward:<br>GACAAGATCTACATCGTGTTTAACTATGTGGAGC               | Millipore Sigma | N/A        |
| Primer CDK11 M516F reverse:<br>GTGCTCCACATAGTTAAACACGATGTAGATCTTG               | Millipore Sigma | N/A        |
| Primer CDK11 G579A forward:<br>CATCCTCAAGGTGGCGGACTTCGGGCTGG                    | Millipore Sigma | N/A        |
| Primer CDK11 G579A reverse:<br>CAGCCCGAAGTCCGCCACCTTGAGGATGC                    | Millipore Sigma | N/A        |
| Primer CDK11 G579S forward:<br>CATCCTCAAGGTGAGCGACTTCGGGCTGG                    | Millipore Sigma | N/A        |
| Primer CDK11 G579S reverse:<br>CAGCCCGAAGTCGCTCACCTTGAGGATGC                    | Millipore Sigma | N/A        |
| Primer CDK11 E445G forward:<br>CCTGAACAGGATCGGAGAGGGCACCTATGG                   | Millipore Sigma | N/A        |
| Primer CDK11 E445G reverse:<br>CTCCATAGGTGCCCTCTCCGATCCTGTTCAG                  | Millipore Sigma | N/A        |
| Primer CDK2 F80M forward:<br>CAGCCCGAAGTCGCTCACCTTGAGGATGC                      | Millipore Sigma | N/A        |
| Primer CDK2 F80M reverse:<br>GTGCAGAAATTCATAACCAGGTAGAGTTTATTTCTG               | Millipore Sigma | N/A        |
| Primer CDK2 A144G forward:<br>GGCCATCAAGCTAGGCGACTTTGGACTAG                     | Millipore Sigma | N/A        |
| Primer CDK2 A144G reverse:<br>GGCTAGTCCAAAGTCGCCTAGCTTGATGG                     | Millipore Sigma | N/A        |
| Primer CDK2 G11E forward:<br>GGAAAAGATCGAAGAGGGCACGTACG                         | Millipore Sigma | N/A        |
| Primer CDK2 G11E reverse:<br>GTACGTGCCCTCTTCGATCTTTTCCAC                        | Millipore Sigma | N/A        |
| Primer Cyclin A N173 SfoI forward:<br>GCCAATGAAGTACCAGACTACCATGAGG              | Millipore Sigma | N/A        |
| Primer Cyclin A C432 XhoI forward:<br>GCGCTCGAGTTACAGATTTAGTGTCTCTGG            | Millipore Sigma | N/A        |
